# Supplementary material for: Cs[Cl3F10]: A Propeller‐Shaped [Cl3F10]− Anion in a Peculiar A[5]B[5] Structure Type
Source: PubMed Central journal article supplement (PMC7589245; doi:10.1002/anie.202007019), 2020-08-17
Supplement: ANIE-59-18116-s001.pdf [file ANIE-59-18116-s001.pdf]

Supporting Information

**Cs[Cl<sub>3</sub>F<sub>10</sub>]: A Propeller-Shaped [Cl<sub>3</sub>F<sub>10</sub>]<sup>-</sup> Anion in a Peculiar A<sup>[5]</sup>B<sup>[5]</sup> Structure Type**

*Benjamin Scheibe, Antti J. Karttunen, Ulrich Müller, and Florian Kraus\**

anie\_202007019\_sm\_miscellaneous\_information.pdf

Supporting Information  
©Wiley-VCH 2019  
69451 Weinheim, Germany

**Table of Contents**

|                                                                                                                                  |    |
|----------------------------------------------------------------------------------------------------------------------------------|----|
| Experimental Procedures .....                                                                                                    | 2  |
| Selected crystallographic data of Cs[Cl <sub>3</sub> F <sub>10</sub> ] .....                                                     | 3  |
| Crystallographic Considerations .....                                                                                            | 7  |
| Gas-phase quantum-chemical calculations of [X <sub>3</sub> F <sub>10</sub> ] <sup>-</sup> (X = Cl, Br, I) anions .....           | 8  |
| Solid-state quantum-chemical calculations of Cs[Cl <sub>3</sub> F <sub>10</sub> ] .....                                          | 11 |
| Band assignments for the calculated Raman spectrum of Cs[Cl <sub>3</sub> F <sub>10</sub> ] and comparison of Raman spectra ..... | 12 |
| References .....                                                                                                                 | 14 |
| Author Contributions.....                                                                                                        | 14 |

## Experimental Procedures

**General:** All operations were performed on a Monel metal Schlenk line, which was passivated with undiluted fluorine and chlorine trifluoride at various pressures before use. Moisture-sensitive compounds were stored and handled in an Ar-filled glove box (MBraun). Reaction vessels were made out of fluoropolymer (perfluoroalkoxy alkanes, PFA) and passivated with fluorine before use. Preparations were carried out in an atmosphere of dry and purified argon (5.0, Praxair). Chlorine trifluoride was stored over NaF to remove traces of HF. **Caution!** Fluorine, chlorine trifluoride, and fluoridochlorates(III) must be handled using appropriate protective gear with ready access to proper emergency treatment procedures in the event of contact. The aforementioned are potent oxidative fluorinators that are only stable under the rigorously anhydrous conditions employed in the experimental procedures outlined in the Experimental Section. They react vigorously to explosively upon hydrolysis or contact with organic materials. The utmost precautions must be taken when disposing of these materials and their derivatives.

**Synthesis of Cs[Cl<sub>3</sub>F<sub>10</sub>]:** In a typical experiment a PFA reaction vessel was loaded with 46.8 mg CsF (0.308 mmol) inside a glove box and attached to a stainless-steel valve. An excess of ClF<sub>3</sub> (approximately 0.13 g, 1.4 mmol) was then condensed onto the solid at 77 K. The reaction mixture was slowly warmed to room-temperature, at which point the CsF completely dissolved. The resulting solution was then stored at -37 °C. Colorless crystals of Cs[Cl<sub>3</sub>F<sub>10</sub>] grew from the solution after several hours at this temperature. Similar experiments were conducted at a temperature of 0 °C and the isolated crystals were determined to be Cs[Cl<sub>3</sub>F<sub>10</sub>]. The crystals were then transferred from the cold chlorine trifluoride suspensions into cold (<0 °C) Galden HT270 (perfluoropolyether, Solvay). Note that the crystals of Cs[Cl<sub>3</sub>F<sub>10</sub>] were observed to be only stable at low temperatures (≤0 °C) and/or when suspended in chlorine trifluoride. The crystals of Cs[Cl<sub>3</sub>F<sub>10</sub>] rapidly deteriorate upon warming to room temperature and air contact. When excess chlorine trifluoride was removed in vacuo, Cs[ClF<sub>4</sub>] was obtained, which was identified by Raman spectroscopy.

**Single-crystal X-ray diffraction:** Crystals of Cs[Cl<sub>3</sub>F<sub>10</sub>] were selected in the absence of air under dried, cooled perfluoropolyether (Galden HT270, Solvay, stored over molecular sieves 3 Å) and mounted on a MiTeGen loop. Intensity data of suitable crystals were recorded with a D8 Quest diffractometer (Bruker). The diffractometer was operated with monochromatized Mo-K<sub>α</sub> radiation (0.71073 Å, multi layered optics) and equipped with a PHOTON 100 CMOS detector. Evaluation, integration, and reduction of the diffraction data was carried out with the APEX3 software suite.<sup>[1]</sup> Split reflections were observed for multiple specimens, which indicate non-merohedral twinning. The measured crystal was a non-merohedral twin with three components. The cell constants and twin laws were determined with the program CELL\_NOW.<sup>[2]</sup> The diffraction data were corrected for absorption utilizing the multi-scan method of TWINABS within the APEX3 software suite. For the structure solution only the non-overlapping reflections of the major twin component were used. The structure was solved with dual-space methods (SHELXT).<sup>[3]</sup> The data were initially refined with the HKLF5 format option in SHELXL with all reflections (overlapping reflections and non-overlapping reflections of the three twin components).<sup>[4]</sup> The data were then processed with the HKLF5Tools program: the non-overlapping reflections of the weaker diffracting twin components were removed, the non-overlapping reflections of the major twin component were merged in point group 2/m and the overlapping reflections were merged in point group 1. The final refinement was carried out against the detwinned dataset (created by SHELXL with the LIST 8 option as a FCF file and converted to a HKL file with HKLF5Tools).<sup>[5]</sup> The highest residual electron density after the final refinement was 0.78 Å distant from atom Cs(1). Representations of the crystal structure were created with the Diamond software.<sup>[6]</sup> CCDC 1992456 contains the supplementary crystallographic data for this paper. These data are provided free of charge by [The Cambridge Crystallographic Data Centre](https://www.ccdc.cam.ac.uk/).

**Raman spectroscopy:** The Raman spectra were measured with a Monovista CRS+ confocal Raman microscope (Spectroscopy & Imaging GmbH) using a 532 nm solid-state laser and either a 300 grooves/mm (low-resolution mode, FWHM: <4.62 cm<sup>-1</sup>) or an 1800 grooves/mm (high-resolution mode, FWHM: <0.368 cm<sup>-1</sup>) grating. Sample preparation of Cs[Cl<sub>3</sub>F<sub>10</sub>]: A crop of colorless crystals was quickly transferred from a cold chlorine trifluoride suspension (ca. -37 °C) into Galden HT270 (perfluoropolyether, Solvay) on a microscope slide with a recess. The microscope slide was located slightly above a small Dewar vessel, which was filled with liquid nitrogen. Raman spectra of the crystals were recorded as soon as the perfluoropolyether was a viscous liquid (approximately -66 °C, which is the pour point of Galden HT270).

Selected crystallographic data of Cs[Cl<sub>3</sub>F<sub>10</sub>]Determination of the cell constants and twin law using CELL\_NOW<sup>[2]</sup>

## CELL\_NOW output:

The following cells would appear to be plausible, but should be checked using XPREP because they are not necessarily the conventional cells.

FOM, % within 0.2, a..gamma, volume and lattice type for potential unit-cells:

```

1 1.000 78.1 6.887 15.380 9.089 90.01 91.21 89.93 962.5 P
2 0.651 78.1 6.887 15.380 11.288 90.02 126.41 89.93 962.3 P
3 0.494 79.7 6.887 9.089 16.848 89.50 65.93 88.79 962.7 P
4 0.420 79.3 6.887 9.089 17.868 59.43 89.44 88.79 962.8 P
5 0.416 80.6 6.887 9.089 19.215 61.27 68.44 88.79 962.9 P
6 0.393 77.5 6.887 9.089 16.856 89.48 65.82 88.79 962.3 P
7 0.330 78.2 6.887 9.089 19.082 117.94 110.60 91.21 962.6 P
8 0.327 77.9 11.523 15.380 16.343 90.03 94.16 89.97 2888.9 P
9 0.324 79.8 6.887 11.288 16.848 75.99 65.93 53.59 962.5 P
10 0.315 76.5 6.887 9.089 17.865 59.41 89.34 88.79 962.4 P
11 0.305 77.2 11.288 15.380 16.669 90.04 93.34 89.98 2888.9 P
12 0.301 77.4 6.887 15.380 22.575 90.04 126.41 89.93 1924.7 P

```

Cell for domain 1: 6.887 15.380 9.089 90.01 91.21 89.93

Figure of merit: 0.845 % (0.1): 74.7 % (0.2): 78.1 % (0.3): 82.7

Orientation matrix:

```

0.09446988 -0.02510910 0.07350846
0.02914441 -0.04837650 -0.06969371
0.10637643 0.03545101 -0.04302402

```

Percentages of reflections in this domain not consistent with lattice types:

A: 36.2, B: 51.0, C: 49.1, I: 48.8, F: 68.1, O: 66.9 and R: 67.2%

Percentages of reflections in this domain that do not have:

h=2n: 49.9, k=2n: 51.4, l=2n: 49.6, h=3n: 67.3, k=3n: 68.0, l=3n: 66.8%

19783 reflections within tolerance assigned to domain 1,  
19783 of them exclusively; 4897 reflections not yet assigned to a domain

Cell for domain 2: 6.887 15.380 9.089 90.01 91.21 89.93

Figure of merit: 0.470 % (0.1): 46.7 % (0.2): 52.7 % (0.3): 63.4

Orientation matrix:

```

0.09041524 -0.02595982 -0.07266141
0.02975903 0.05938596 -0.03815977
0.10967856 0.00518869 0.07332070

```

Rotated from first domain by 118.8 degrees about

reciprocal axis 1.000 0.002 -0.028 and real axis 1.000 0.000 0.000

Twin law to convert hkl from first to this domain (SHELXL TWIN matrix):

```

1.000 0.000 0.000
-0.038 -0.482 -1.483
-0.042 0.518 -0.482

```

12849 reflections within tolerance assigned to domain 2,  
2828 of them exclusively; 2069 reflections not yet assigned to a domain

Cell for domain 3: 6.887 15.380 9.089 90.01 91.21 89.93

Figure of merit: 0.704 % (0.1): 69.7 % (0.2): 71.2 % (0.3): 76.5

Orientation matrix:

```

-0.09413844 0.04955499 -0.00076555
-0.02969191 -0.01075762 -0.10662626
-0.10651876 -0.04069526 0.02724020

```

Rotated from first domain by 179.9 degrees about

reciprocal axis -0.014 0.961 1.000 and real axis 0.003 0.335 1.000

Twin law to convert hkl from first to this domain (SHELXL TWIN matrix):

```

-1.000 -0.007 -0.020
0.007 -0.513 1.453
0.004 0.507 0.513

```

10441 reflections within tolerance assigned to domain 3,  
1505 of them exclusively; 564 reflections not yet assigned to a domain

Compared to the output of CELL\_NOW the unit cell was transformed according to  $\mathbf{c}$ ,  $-\mathbf{b}$ ,  $\mathbf{a}$  and correspondingly  $l-k, h$ . This way, the monoclinic  $c$  axis coincides with the pseudo-hexagonal  $c$  axis and the monoclinic unit cell corresponds to the orthohexagonal cell. The axes of the twin domains mentioned in the output of CELL\_NOW have to be relabeled accordingly.

**Table S1.** Selected crystallographic data and details of the structure determination of Cs[Cl<sub>3</sub>F<sub>10</sub>].

|                                                                                          |                                                                    |
|------------------------------------------------------------------------------------------|--------------------------------------------------------------------|
| Formula                                                                                  | CsCl <sub>3</sub> F <sub>10</sub>                                  |
| Molar mass / g·mol <sup>-1</sup>                                                         | 429.26                                                             |
| Space group (No.)                                                                        | <i>P</i> 12 <sub>1</sub> / <i>n</i> 1 (14)                         |
| <i>a</i> / Å                                                                             | 9.0949(7)                                                          |
| <i>b</i> / Å                                                                             | 15.3652(12)                                                        |
| <i>c</i> / Å                                                                             | 6.8841(5)                                                          |
| $\beta$ / °                                                                              | 91.314(2)                                                          |
| <i>V</i> / Å <sup>3</sup>                                                                | 961.77(13)                                                         |
| <i>Z</i>                                                                                 | 4                                                                  |
| Pearson symbol                                                                           | <i>mP</i> 56                                                       |
| $\rho_{\text{calc.}}$ / g·cm <sup>-3</sup>                                               | 2.97                                                               |
| $\mu$ / mm <sup>-1</sup>                                                                 | 4.795                                                              |
| Color                                                                                    | colorless                                                          |
| Crystal morphology                                                                       | block                                                              |
| Crystal size / mm <sup>3</sup>                                                           | 0.060 · 0.082 · 0.170                                              |
| <i>T</i> / K                                                                             | 100                                                                |
| $\lambda$ / Å                                                                            | 0.71073 (Mo-K $\alpha$ )                                           |
| No. of reflections                                                                       | 72465                                                              |
| $\theta$ range / °                                                                       | 2.60-30.50                                                         |
| Range of Miller indices                                                                  | $-12 \leq h \leq 12$<br>$-21 \leq k \leq 21$<br>$-9 \leq l \leq 9$ |
| Absorption correction                                                                    | multi-scan                                                         |
| <i>T</i> <sub>max</sub> , <i>T</i> <sub>min</sub>                                        | 0.75, 0.51                                                         |
| <i>R</i> <sub>int</sub> , <i>R</i> $\sigma$                                              | 0.050, 0.0471                                                      |
| Completeness of the data set                                                             | 0.996                                                              |
| No. of unique reflections                                                                | 2915                                                               |
| No. of parameters                                                                        | 127                                                                |
| No. of restraints                                                                        | 0                                                                  |
| No. of constraints                                                                       | 0                                                                  |
| <i>S</i> (all data)                                                                      | 1.09                                                               |
| <i>R</i> ( <i>F</i> ) ( <i>I</i> $\geq$ 2 $\sigma$ ( <i>I</i> ), all data)               | 0.0353, 0.0459                                                     |
| <i>wR</i> ( <i>F</i> <sup>2</sup> ) ( <i>I</i> $\geq$ 2 $\sigma$ ( <i>I</i> ), all data) | 0.0819, 0.0863                                                     |
| Extinction coefficient                                                                   | not refined                                                        |
| $\Delta\rho_{\text{max}}$ , $\Delta\rho_{\text{min}}$ / e·Å <sup>-3</sup>                | 2.29, -1.26                                                        |

**Table S2.** Atomic coordinates and equivalent isotropic displacement parameters  $U_{\text{iso}}$  of Cs[Cl<sub>3</sub>F<sub>10</sub>] at 100 K.

| Atom  | Position | $x$         | $y$         | $z$         | $U_{\text{iso}} / \text{\AA}^2$ |
|-------|----------|-------------|-------------|-------------|---------------------------------|
| Cs(1) | 4e       | 0.01291(2)  | 0.34115(2)  | 0.26558(3)  | 0.02195(9)                      |
| Cl(1) | 4e       | 0.00999(7)  | 0.18673(5)  | 0.79210(11) | 0.01919(16)                     |
| Cl(2) | 4e       | 0.22709(8)  | 0.39970(5)  | 0.77877(11) | 0.01866(16)                     |
| Cl(3) | 4e       | -0.19246(8) | 0.40043(5)  | 0.75364(10) | 0.01628(15)                     |
| F(1)  | 4e       | 0.0182(2)   | 0.32657(13) | 0.6995(3)   | 0.0238(4)                       |
| F(2)  | 4e       | -0.1537(2)  | 0.16571(15) | 0.6662(4)   | 0.0417(6)                       |
| F(3)  | 4e       | 0.0091(2)   | 0.08724(12) | 0.8674(3)   | 0.0352(5)                       |
| F(4)  | 4e       | 0.1731(2)   | 0.20129(14) | 0.9274(3)   | 0.0338(5)                       |
| F(5)  | 4e       | 0.3386(3)   | 0.32653(14) | 0.6604(4)   | 0.0402(6)                       |
| F(6)  | 4e       | 0.3719(2)   | 0.45434(14) | 0.8376(3)   | 0.0364(5)                       |
| F(7)  | 4e       | 0.1245(2)   | 0.47666(14) | 0.9043(3)   | 0.0283(5)                       |
| F(8)  | 4e       | -0.1472(2)  | 0.47675(14) | 0.5765(3)   | 0.0298(5)                       |
| F(9)  | 4e       | -0.3422(2)  | 0.45278(14) | 0.7841(3)   | 0.0327(5)                       |
| F(10) | 4e       | -0.2477(2)  | 0.32775(13) | 0.9320(3)   | 0.0329(5)                       |

**Table S3.** Anisotropic displacement parameters of Cs[Cl<sub>3</sub>F<sub>10</sub>] at 100 K.

| Atom  | $U_{11} / \text{\AA}^2$ | $U_{22} / \text{\AA}^2$ | $U_{33} / \text{\AA}^2$ | $U_{23} / \text{\AA}^2$ | $U_{13} / \text{\AA}^2$ | $U_{12} / \text{\AA}^2$ |
|-------|-------------------------|-------------------------|-------------------------|-------------------------|-------------------------|-------------------------|
| Cs(1) | 0.02457(12)             | 0.02174(13)             | 0.01951(12)             | 0.00040(7)              | -0.00004(8)             | -0.00298(7)             |
| Cl(1) | 0.0185(3)               | 0.0186(4)               | 0.0202(3)               | -0.0026(3)              | -0.0047(3)              | 0.0022(2)               |
| Cl(2) | 0.0193(3)               | 0.0165(4)               | 0.0205(4)               | 0.0012(3)               | 0.0067(3)               | 0.0026(3)               |
| Cl(3) | 0.0149(3)               | 0.0159(3)               | 0.0179(3)               | -0.0002(2)              | -0.0024(2)              | -0.0002(2)              |
| F(1)  | 0.0217(9)               | 0.0226(10)              | 0.0269(10)              | 0.0031(8)               | -0.0015(7)              | 0.0053(7)               |
| F(2)  | 0.0291(12)              | 0.0431(14)              | 0.0521(16)              | -0.0145(11)             | -0.0209(11)             | -0.0006(9)              |
| F(3)  | 0.0389(12)              | 0.0168(10)              | 0.0497(14)              | 0.0020(10)              | -0.0023(10)             | 0.0002(9)               |
| F(4)  | 0.0285(11)              | 0.0343(13)              | 0.0378(12)              | 0.0115(9)               | -0.0177(9)              | -0.0046(9)              |
| F(5)  | 0.0434(14)              | 0.0261(11)              | 0.0521(15)              | -0.0031(10)             | 0.0274(12)              | 0.0092(10)              |
| F(6)  | 0.0194(9)               | 0.0311(12)              | 0.0591(16)              | -0.0026(10)             | 0.0092(10)              | -0.0078(8)              |
| F(7)  | 0.0239(10)              | 0.0283(11)              | 0.0328(11)              | -0.0117(9)              | 0.0030(9)               | 0.0053(8)               |
| F(8)  | 0.0335(11)              | 0.0240(11)              | 0.0317(11)              | 0.0090(9)               | -0.0014(9)              | 0.0005(9)               |
| F(9)  | 0.0192(9)               | 0.0345(12)              | 0.0445(13)              | 0.0025(10)              | 0.0016(9)               | 0.0098(8)               |
| F(10) | 0.0344(12)              | 0.0338(12)              | 0.0306(12)              | 0.0094(9)               | 0.0071(9)               | -0.0024(9)              |

**Table S4.** Selected experimental and computational (DFT-PBE0/TZVP, solid-state and DFT-PBE0/TZVP, gas-phase,  $D_3$  symmetry) atom distances for the [Cl<sub>3</sub>F<sub>10</sub>]<sup>-</sup> anion.

|             | $d$ (experimental) / $\text{\AA}$ | $d$ (DFT-PBE0, solid-state) / $\text{\AA}$ | $d$ (DFT-PBE0, gas-phase) / $\text{\AA}$ |
|-------------|-----------------------------------|--------------------------------------------|------------------------------------------|
| Cl(1)-F(1)  | 2.243(2)                          |                                            |                                          |
| Cl(2)-F(1)  | 2.263(2)                          | 2.24-2.27                                  | 2.22                                     |
| Cl(3)-F(1)  | 2.265(2)                          |                                            |                                          |
| Cl(1)-F(2)  | 1.736(2)                          |                                            |                                          |
| Cl(1)-F(4)  | 1.747(2)                          |                                            |                                          |
| Cl(2)-F(5)  | 1.730(2)                          |                                            |                                          |
| Cl(2)-F(7)  | 1.747(2)                          | 1.74-1.76                                  | 1.73                                     |
| Cl(3)-F(8)  | 1.747(2)                          |                                            |                                          |
| Cl(3)-F(10) | 1.743(2)                          |                                            |                                          |
| Cl(1)-F(3)  | 1.615(2)                          |                                            |                                          |
| Cl(2)-F(6)  | 1.606(2)                          | 1.60-1.62                                  | 1.64                                     |
| Cl(3)-F(9)  | 1.600(2)                          |                                            |                                          |

**Table S5.** Selected experimental and computational (DFT-PBE0/TZVP, solid-state and DFT-PBE0/def2-TZVP, gas-phase  $D_3$  symmetry) angles for the  $[\text{Cl}_3\text{F}_{10}]^-$  anion.

|                  | $\angle$ (experimental) / ° | $\angle$ (DFT-PBE0, solid-state) / ° | $\angle$ (DFT-PBE0, gas-phase) / ° |
|------------------|-----------------------------|--------------------------------------|------------------------------------|
| Cl(1)–F(1)–Cl(2) | 116.12(8)                   |                                      |                                    |
| Cl(2)–F(1)–Cl(3) | 114.83(9)                   | 109.8-115.5                          | 120                                |
| Cl(3)–F(1)–Cl(1) | 113.52(9)                   |                                      |                                    |
| F(1)–Cl(1)–F(3)  | 177.29(10)                  |                                      |                                    |
| F(1)–Cl(2)–F(6)  | 178.03(10)                  | 177.2-178.1                          | 180                                |
| F(1)–Cl(3)–F(9)  | 178.03(10)                  |                                      |                                    |
| F(2)–Cl(1)–F(4)  | 176.13(12)                  |                                      |                                    |
| F(5)–Cl(2)–F(7)  | 176.42(12)                  | 176.1-176.7                          | 174.5                              |
| F(8)–Cl(3)–F(10) | 176.47(11)                  |                                      |                                    |
| F(2)–Cl(1)–F(3)  | 88.50(11)                   |                                      |                                    |
| F(3)–Cl(1)–F(4)  | 87.73(11)                   |                                      |                                    |
| F(5)–Cl(2)–F(6)  | 88.41(12)                   |                                      |                                    |
| F(6)–Cl(2)–F(7)  | 88.05(11)                   | 87.8-88.6                            | 87.3                               |
| F(8)–Cl(3)–F(9)  | 88.19(11)                   |                                      |                                    |
| F(9)–Cl(3)–F(10) | 88.28(11)                   |                                      |                                    |

## Crystallographic Considerations

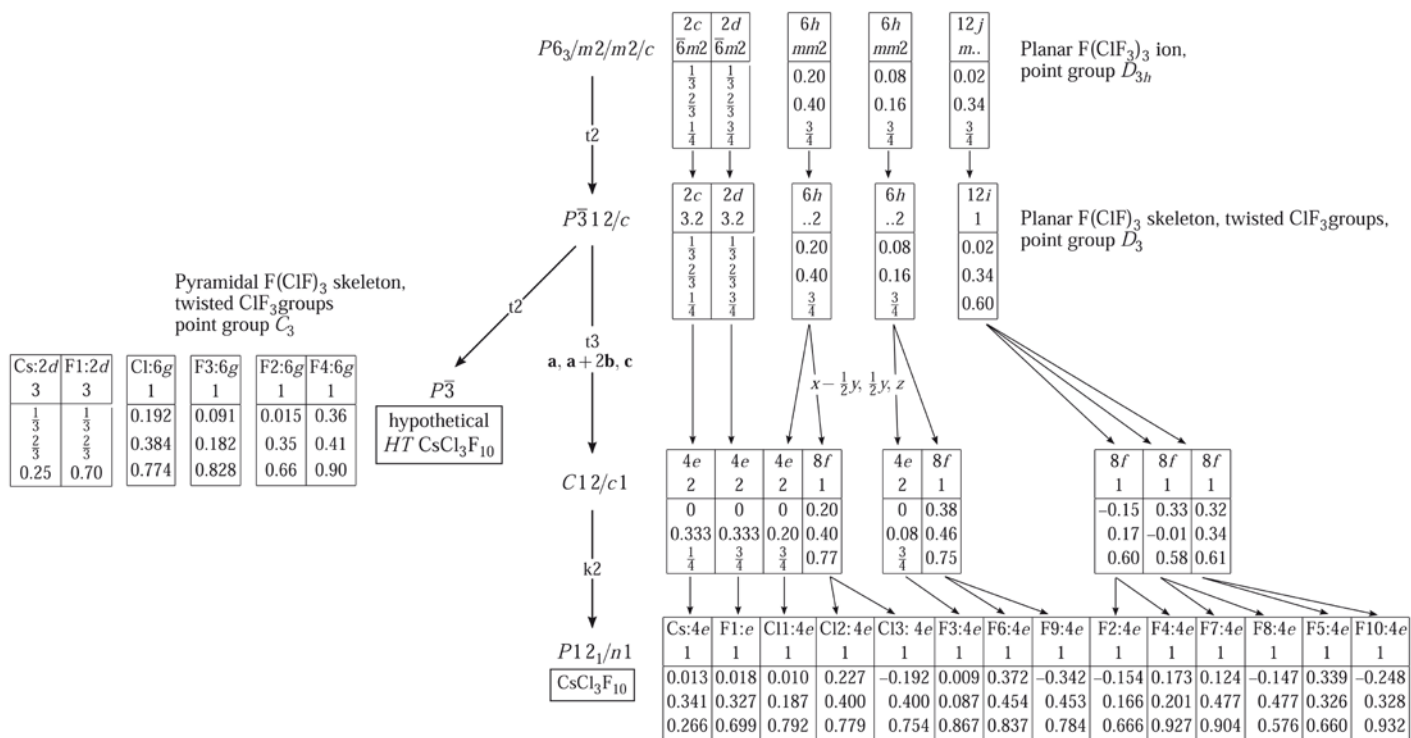

Atomic positions that result from the positions  $8f$  of  $C12/c1$ , are equivalent in  $C12/c1$  by a twofold rotation axis  $(\bar{x}, y, \frac{1}{2} - z)$

**Figure S1.** Bärnighausen tree showing the group-subgroup relations from a hexagonal aristotype with Cs atoms arranged as in the Mg type and with planar  $[Cl_3F_{10}]^-$  in its trigonal pyramidal voids to the real structure of  $Cs[Cl_3F_{10}]$ . The branch to the space group  $P\bar{3}$  shows the relation to a hypothetical high-temperature form of  $Cs[Cl_3F_{10}]$ .

The actual crystal structure corresponds in good approximation to a hypothetical structure in the space group  $P\bar{3}$ , which is another subgroup of  $P6_3/mmc$  (Figure S1). It seems probable that this could be a trigonal high-temperature modification of  $Cs[Cl_3F_{10}]$  that, however, possibly cannot be obtained because of its instability at temperatures higher than 0 °C. This is in accordance with the observed twinning. As mentioned above (Selected crystallographic data), there exists a twin domain 3 rotated by 180° about  $a$  and another twin domain 2 rotated by 120° about  $c$ . That is exactly what is to be expected from the Bärnighausen tree, where we have a *translationengleiche* subgroup of index 2 (marked  $t2$ ) giving rise to twins, and another one of index 3 ( $t3$ ) giving rise to triplet twinning. Since the space group  $P\bar{3}$  is not a direct supergroup of  $P12_1/n1$ , a phase transformation from the real to the hypothetical high-temperature form could only be a first-order transformation.



Gas-phase quantum-chemical calculations of  $[X_3F_{10}]^-$  ( $X = \text{Cl, Br, I}$ ) anions

Gas-phase quantum-chemical calculations for the anions  $[X_3F_{10}]^-$  ( $X = \text{Cl, Br, I}$ ) were carried out with the TURBOMOLE program package (version 7.3.) using the PBE0 hybrid density functional method and Karlsruhe triple-zeta-valence + polarization basis sets (def2-TZVP for Cl and Br, dhf-TZVP for I).<sup>[7-9]</sup> The resolution-of-the-identity technique was used to speed up the calculations.<sup>[10,11]</sup> All calculations were done in the gas phase without any solvent models. A full geometry optimization was carried out in the  $D_3$  point group. All structures were confirmed to be true local minima by harmonic frequency calculations. The bonding in the studied species was investigated with the help of Intrinsic Atomic Orbitals (IAOs) and Intrinsic Bond Orbitals (IBOs) using the program package IboView.<sup>[12,13]</sup> The plotted IBO isosurfaces enclose 80% of the total electron density of the IBO.

XYZ coordinates of the geometry-optimized  $[\text{Cl}_3\text{F}_{10}]^-$  anion

```
Cl 1.1077871 -1.9187436 0.0000000
Cl 1.1077871 1.9187436 0.0000000
F 0.0000000 0.0000000 0.0000000
F 0.1358137 2.5755586 -1.2780215
F 1.9275393 -3.3385960 0.0000000
F 2.1625923 1.4053974 1.2780215
F 2.1625923 -1.4053974 -1.2780215
F 0.1358137 -2.5755586 1.2780215
F 1.9275393 3.3385960 0.0000000
Cl -2.2155742 0.0000000 0.0000000
F -3.8550786 0.0000000 0.0000000
F -2.2984060 1.1701612 1.2780215
F -2.2984060 -1.1701612 -1.2780215
```

XYZ coordinates of the geometry-optimized  $[\text{Br}_3\text{F}_{10}]^-$  anion

```
Br 1.1496286 -1.9912152 0.0000000
Br 1.1496286 1.9912152 0.0000000
F -0.0000000 0.0000000 0.0000000
F 0.1667520 2.6976675 -1.3923404
F 2.0305703 -3.5170509 0.0000000
F 2.2528726 1.4932452 1.3923404
F 2.2528726 -1.4932452 -1.3923404
F 0.1667520 -2.6976675 1.3923404
F 2.0305703 3.5170509 0.0000000
Br -2.2992573 0.0000000 0.0000000
F -4.0611406 0.0000000 0.0000000
F -2.4196246 1.2044223 1.3923404
F -2.4196246 -1.2044223 -1.3923404
```

XYZ coordinates of the geometry-optimized  $[\text{I}_3\text{F}_{10}]^-$  anion

```
I 1.2209583 -2.1147618 0.0000000
I 1.2209583 2.1147618 0.0000000
F 0.0000000 0.0000000 0.0000000
F 0.3666149 2.8334558 -1.6241675
F 2.1708407 -3.7600063 0.0000000
F 2.2705373 1.7342257 1.6241675
F 2.2705373 -1.7342257 -1.6241675
F 0.3666149 -2.8334558 1.6241675
F 2.1708407 3.7600063 0.0000000
I -2.4419166 0.0000000 0.0000000
F -4.3416813 0.0000000 0.0000000
F -2.6371521 1.0992301 1.6241675
F -2.6371521 -1.0992301 -1.6241675
```

**Table S6.** Partial atomic charges for the  $[X_3F_{10}]^-$  ( $X = \text{Cl, Br, I}$ ) anions from Intrinsic Atomic Orbital (IAO) analysis ( $e^-$  units).

| Atom               | $[\text{Cl}_3\text{F}_{10}]^-$ | $[\text{Br}_3\text{F}_{10}]^-$ | $[\text{I}_3\text{F}_{10}]^-$ |
|--------------------|--------------------------------|--------------------------------|-------------------------------|
| X                  | 1.29                           | 1.44                           | 1.68                          |
| $\mu_3\text{-F}$   | -0.60                          | -0.62                          | -0.67                         |
| $F_{\text{trans}}$ | -0.39                          | -0.45                          | -0.55                         |
| $F_{\text{cis}}$   | -0.52                          | -0.56                          | -0.62                         |

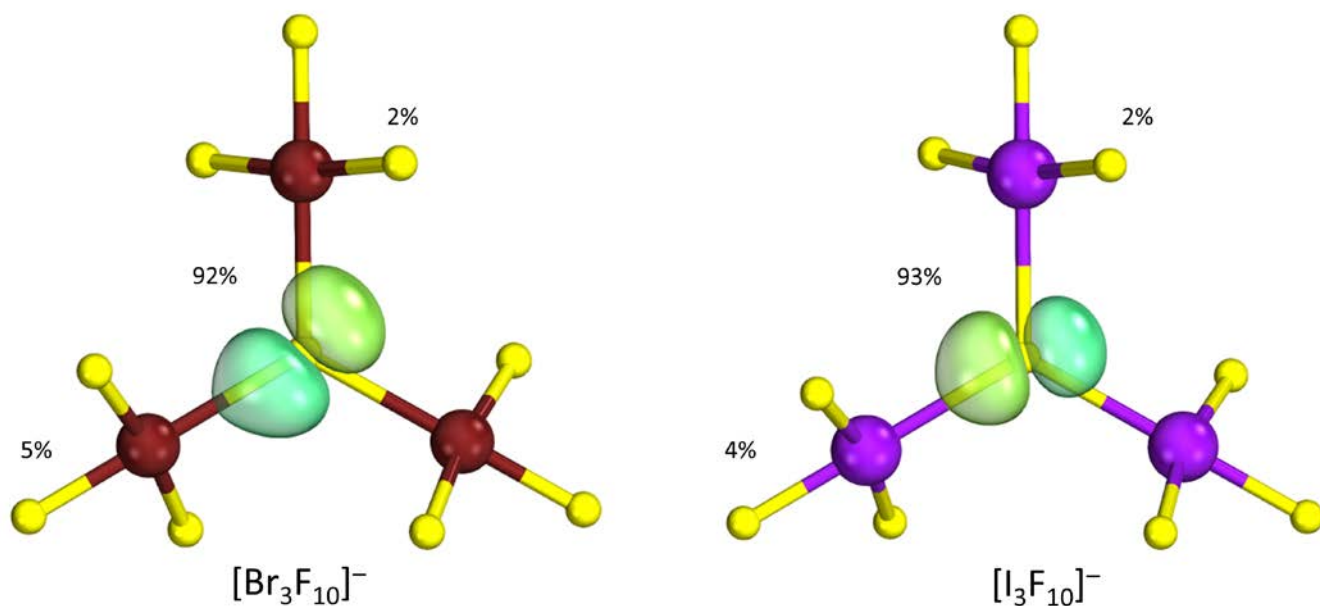

**Figure S2.** One of the two intrinsic bond orbitals (IBOs) showing the  $\mu_3$ -F-X bonds in the  $[\text{Br}_3\text{F}_{10}]^-$  and  $[\text{I}_3\text{F}_{10}]^-$  anions ( $X = \text{Br}, \text{I}$ ).<sup>[22]</sup> The percentages indicate the contribution of the halogen atoms and the  $\mu_3$ -F atom to the IBO. The larger the percentage, the more polarized the bond. For comparison: For a gas-phase NaF molecule, in which the bond should be highly ionic, the contribution of the F atom is 96 %. In the  $\text{H}_2$  molecule, which has a purely covalent bond, the contribution of each atom is 50 %. If the summation of the percentages does not add up to 100 %, then other atoms contribute – less than 1 % – to the IBO. F atoms: yellow, Br atoms: reddish brown, I atoms: purple.

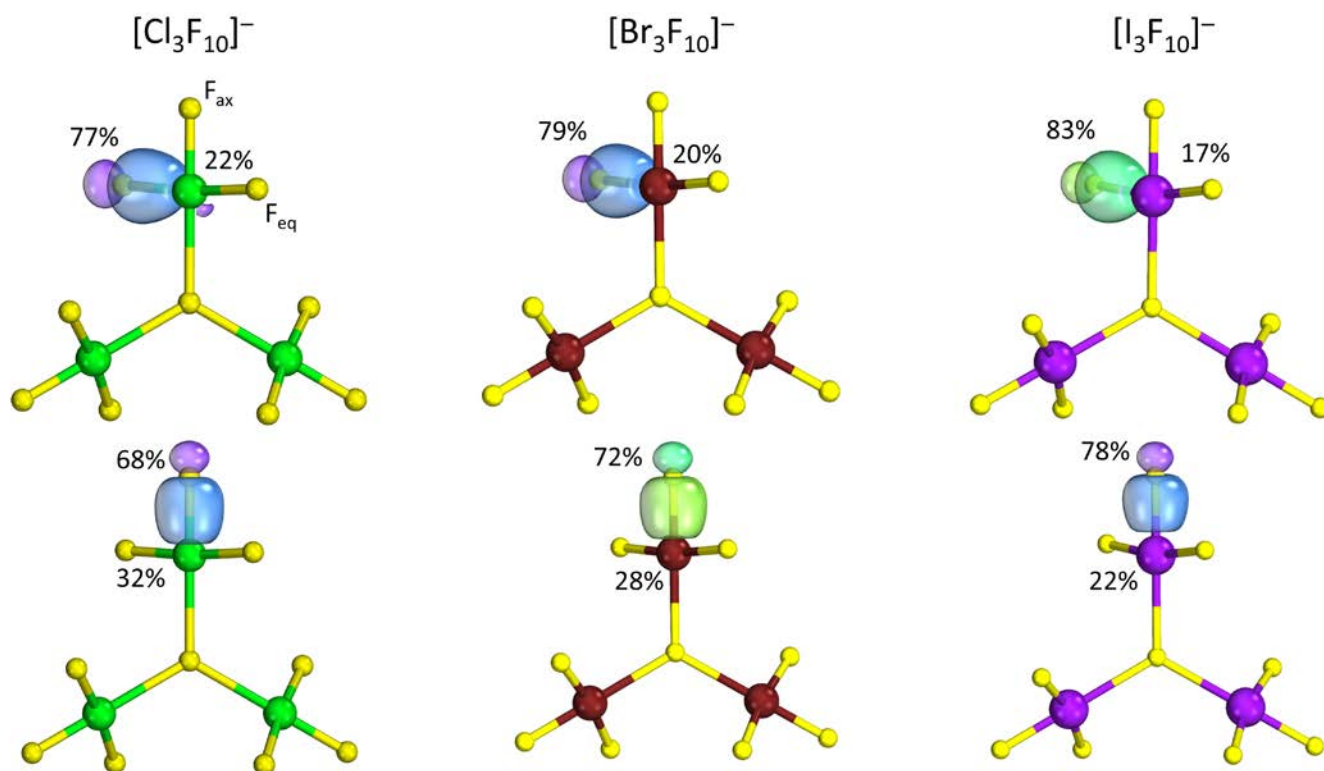

**Figure S3.** Intrinsic Bond Orbitals (IBOs) showing X-F<sub>cis</sub> (top) and X-F<sub>trans</sub> (bottom) bonds in the  $[\text{X}_3\text{F}_{10}]^-$  anions ( $X = \text{Cl}, \text{Br}, \text{I}$ ). Percentages indicate the contribution of each atom to the IBO. The larger the percentage, the more polarized the bond. For comparison: For a gas-phase NaF molecule, in which the bond should be highly ionic, the contribution of the F atom is 96 %. In the  $\text{H}_2$  molecule, which has a purely covalent bond, the contribution of each atom is 50 %. If the summation of the percentages does not add up to 100 %, then other atoms contribute – less than 1 % – to the IBO. F atoms: yellow, Cl atoms: green, Br atoms: reddish brown, I atoms: purple.

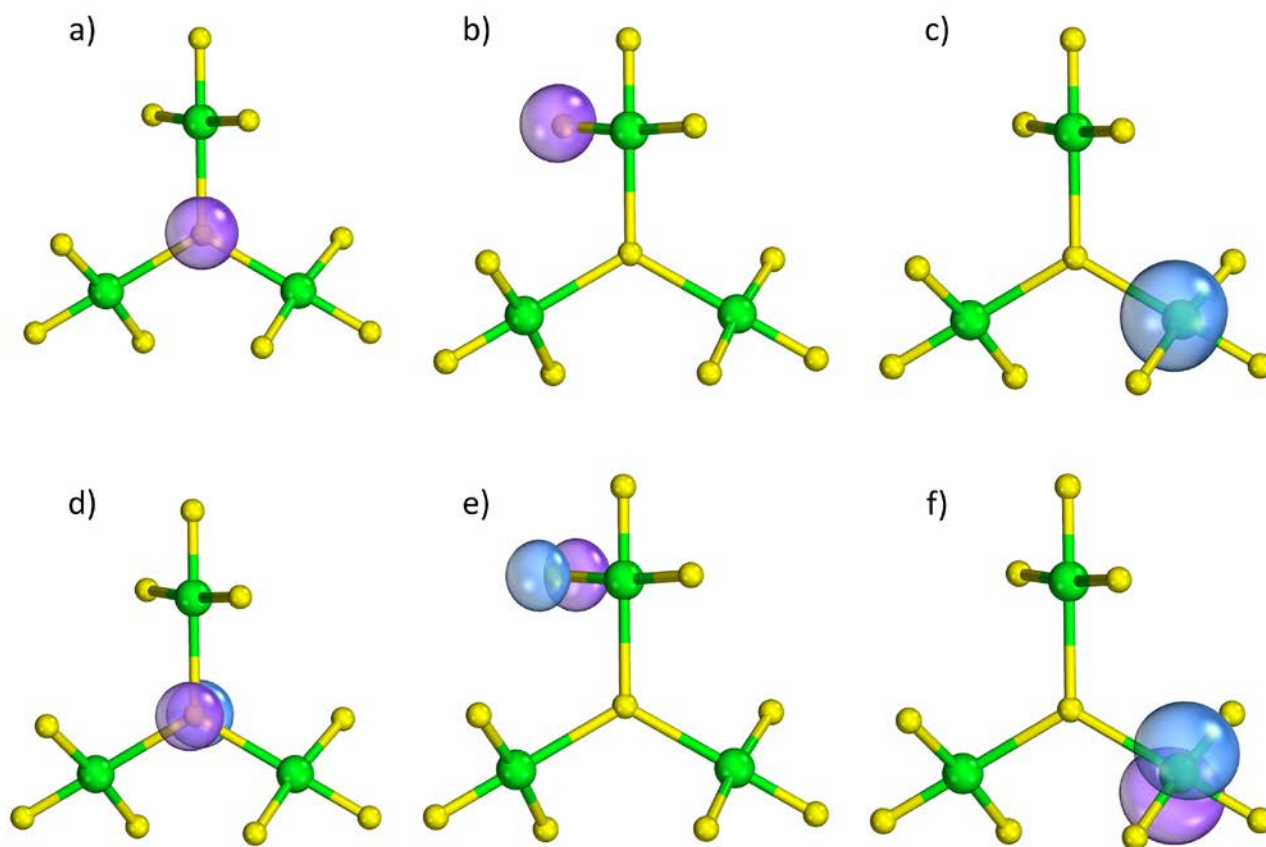

**Figure S4.** Examples of non-bonding Intrinsic Bond Orbitals (IBOs) in the  $[\text{Cl}_3\text{F}_{10}]^-$  anion. s-orbital-like IBOs are shown in a)-c). p-orbital-like IBOs are shown in d)-f). F atoms in yellow, Cl atoms in green.

**Solid-state quantum-chemical calculations of Cs[Cl<sub>3</sub>F<sub>10</sub>]**

Periodic quantum-chemical calculations were carried out for Cs[Cl<sub>3</sub>F<sub>10</sub>] with the PBE0 hybrid density functional theory method (DFT-PBE0).<sup>[14,15]</sup> A triple-zeta-valence + polarization (TZVP) level basis set was applied for F and Cl and a split-valence + polarization (SVP) level basis set was applied for Cs. The basis sets were derived from the Karlsruhe def2 basis sets and taken from previous studies.<sup>[9,16–18]</sup> All calculations were carried out with the CRYSTAL17 program package.<sup>[19]</sup> The reciprocal space was sampled with a 4×2×3 Monkhorst-Pack-type *k*-point grid. For the evaluation of the Coulomb and exchange integrals (TOLINTEG), tight tolerance factors of 8, 8, 8, 8, 16 were used for all calculations. Both the atomic positions and lattice parameters were fully optimized within the constraints imposed by the space group symmetry. Default DFT integration grids and optimization convergence thresholds were applied in all calculations. The harmonic vibrational frequencies and Raman intensities were obtained through usage of the computational scheme implemented in CRYSTAL17.<sup>[20–23]</sup> The Raman intensities were calculated for a polycrystalline powder sample (total isotropic intensity in arbitrary units). The Raman spectra were obtained by using a pseudo-Voigt band profile (50:50 Lorentzian:Gaussian) and an FWHM of 8 cm<sup>-1</sup>. The Raman spectra were simulated taking into account the experimental setup (*T* = 207.15 K, *λ* = 532 nm). The band assignments were carried out by visual inspection of the normal modes with the Jmol program package.<sup>[24]</sup>

**Lattice parameters and atomic coordinates of the optimized solid-state structure of Cs[Cl<sub>3</sub>F<sub>10</sub>]**

Space group *P*2<sub>1</sub>/*n* (No. 14) – here, a different space group setting was used, so lattice parameters and atomic coordinates are interchanged compared to the deposited crystal structure. However, the results are of course identical.

*a* = 7.29891298 Å, *b* = 15.29673244 Å, *c* = 9.12132812 Å, *β* = 93.243220°, *V* = 1016.760812 Å<sup>3</sup>

**Table S7.** Atomic coordinates of the optimized structure of Cs[Cl<sub>3</sub>F<sub>10</sub>].

| Atom  | <i>x</i>            | <i>y</i>           | <i>z</i>            |
|-------|---------------------|--------------------|---------------------|
| Cs(1) | 2.762404704911E-01  | 3.487537724337E-01 | -4.851377917018E-01 |
| Cl(1) | -2.499977788070E-01 | 3.955001550605E-01 | 3.214039278472E-01  |
| Cl(2) | -2.064146484759E-01 | 1.831217546430E-01 | -4.824472805740E-01 |
| Cl(3) | -2.060477666329E-01 | 3.962893633638E-01 | -2.590965482665E-01 |
| F(1)  | -3.040827548803E-01 | 3.229303714803E-01 | -4.672212545441E-01 |
| F(2)  | -8.247541012499E-02 | 4.685669529561E-01 | -3.710187149355E-01 |
| F(3)  | -2.222373885948E-01 | 4.480775087627E-01 | 1.683737183078E-01  |
| F(4)  | -4.298632094940E-01 | 4.701207408601E-01 | 3.563317591261E-01  |
| F(5)  | -6.719095268031E-02 | 3.257530157643E-01 | 2.773161315502E-01  |
| F(6)  | -3.224952817150E-01 | 3.292216490220E-01 | -1.376579378583E-01 |
| F(7)  | -1.277514849546E-01 | 4.531752927419E-01 | -1.171161103897E-01 |
| F(8)  | -1.259557260578E-01 | 8.312380724319E-02 | -4.867301386579E-01 |
| F(9)  | -9.138593581981E-02 | 1.949154564508E-01 | -3.070629551867E-01 |
| F(10) | -3.152329059001E-01 | 1.650743845394E-01 | 3.414527937302E-01  |

Band assignments for the calculated Raman spectrum of Cs[Cl<sub>3</sub>F<sub>10</sub>] and comparison of Raman spectra

**Table S8.** Band assignments for the calculated Raman spectrum (>300 cm<sup>-1</sup>) of Cs[Cl<sub>3</sub>F<sub>10</sub>]. The notation for band assignments is the following:  $\nu$  – stretching,  $\delta$  – deformation,  $s$  – symmetric,  $as$  – asymmetric. The irreducible representation is given for the point group  $C2/m$  ( $C_{2h}$ ) of the space group  $P2_1/n$  (No. 14). The point group of the [Cl<sub>3</sub>F<sub>10</sub>]<sup>-</sup> anion in the crystal structure is  $C_1$ .

| $\nu$ (calculated) / cm <sup>-1</sup> | $\nu$ (experimental) / cm <sup>-1</sup> | irrep          | Assignment                                                                                               |
|---------------------------------------|-----------------------------------------|----------------|----------------------------------------------------------------------------------------------------------|
| 787                                   |                                         | A <sub>g</sub> |                                                                                                          |
| 779                                   |                                         | B <sub>g</sub> |                                                                                                          |
| 758                                   | 761 & 699                               | B <sub>g</sub> | $\nu_s$ – Symmetric stretching of F <sub>trans</sub> -Cl                                                 |
| 719                                   |                                         | A <sub>g</sub> |                                                                                                          |
| 719                                   |                                         | B <sub>g</sub> |                                                                                                          |
| 715                                   |                                         | A <sub>g</sub> |                                                                                                          |
| 650                                   |                                         | B <sub>g</sub> |                                                                                                          |
| 645                                   |                                         | B <sub>g</sub> |                                                                                                          |
| 639                                   | not observed                            | A <sub>g</sub> | $\nu_{as}$ – Antisymmetric stretching of F <sub>cis</sub> -Cl                                            |
| 619                                   |                                         | B <sub>g</sub> |                                                                                                          |
| 613                                   |                                         | A <sub>g</sub> |                                                                                                          |
| 586                                   |                                         | A <sub>g</sub> |                                                                                                          |
| 510                                   |                                         | A <sub>g</sub> |                                                                                                          |
| 509                                   |                                         | B <sub>g</sub> |                                                                                                          |
| 509                                   | 498                                     | A <sub>g</sub> | $\nu_s$ – Symmetric stretching of F <sub>cis</sub> -Cl coupled with the central $\mu_3$ -F atom          |
| 508                                   |                                         | B <sub>g</sub> |                                                                                                          |
| 503                                   |                                         | A <sub>g</sub> |                                                                                                          |
| 503                                   |                                         | B <sub>g</sub> |                                                                                                          |
| 381                                   |                                         | B <sub>g</sub> |                                                                                                          |
| 381                                   |                                         | A <sub>g</sub> |                                                                                                          |
| 377                                   | not observed                            | B <sub>g</sub> | $\delta$ – scissoring of F <sub>trans</sub> -Cl, coupled with the central $\mu_3$ -F atom                |
| 376                                   |                                         | B <sub>g</sub> |                                                                                                          |
| 373                                   |                                         | B <sub>g</sub> |                                                                                                          |
| 372                                   |                                         | A <sub>g</sub> |                                                                                                          |
| 367                                   |                                         | B <sub>g</sub> |                                                                                                          |
| 364                                   |                                         | A <sub>g</sub> |                                                                                                          |
| 363                                   |                                         | B <sub>g</sub> |                                                                                                          |
| 361                                   | 334                                     | A <sub>g</sub> | $\delta$ – out-of-plane bending of the ClF <sub>3</sub> groups, coupled with the central $\mu_3$ -F atom |
| 360                                   |                                         | A <sub>g</sub> |                                                                                                          |
| 360                                   |                                         | B <sub>g</sub> |                                                                                                          |
| 341                                   |                                         | B <sub>g</sub> |                                                                                                          |
| 329                                   |                                         | A <sub>g</sub> |                                                                                                          |
| 323                                   |                                         |                |                                                                                                          |
| 316                                   | 315                                     | A <sub>g</sub> | $\delta$ – scissoring of F <sub>cis</sub> -Cl, coupled with the central $\mu_3$ -F atom                  |
| 315                                   |                                         | B <sub>g</sub> |                                                                                                          |
| 313                                   |                                         | A <sub>g</sub> |                                                                                                          |

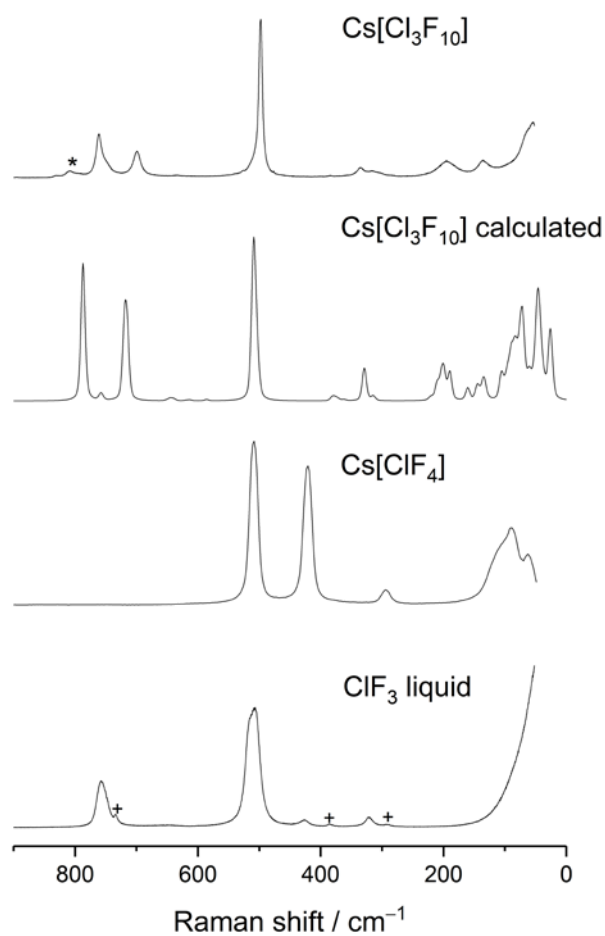

**Figure S5.** Comparison of experimental and calculated Raman spectra. **Cs[Cl<sub>3</sub>F<sub>10</sub>]**: Experimental high-resolution Raman spectrum of crystalline Cs[Cl<sub>3</sub>F<sub>10</sub>] measured at ca. -66 °C under the perfluoropolyether Galden HT270. The asterisk denotes a band caused by Galden HT270. **Cs[Cl<sub>3</sub>F<sub>10</sub>] calculated**: Calculated (DFT-PBE0) solid-state Raman spectrum of Cs[Cl<sub>3</sub>F<sub>10</sub>] taking into account the experimental temperature of -66 °C and the used laser wavelength of 532 nm. **Cs[ClF<sub>4</sub>]**: Experimental low-resolution Raman spectrum of powdered Cs[ClF<sub>4</sub>] measured in a glass vial. **ClF<sub>3</sub> liquid**: Experimental high-resolution Raman spectrum of liquid ClF<sub>3</sub> measured in an FEP (fluorinated ethylene propylene copolymer) sample tube. The plus signs denote bands that are caused by the FEP tube. The Raman intensities are given in arbitrary units.

## References

- [1] APEX3, Bruker AXS Inc., Madison, Wisconsin, USA, **2018**.
- [2] G. M. Sheldrick, *CELL\_NOW*, Göttingen (Germany), **2008**.
- [3] G. M. Sheldrick, *Acta Crystallogr., Sect. A: Found. Adv.* **2015**, *71*, 3–8.
- [4] G. M. Sheldrick, *Acta Crystallogr., Sect. C: Struct. Chem.* **2015**, *71*, 3–8.
- [5] S. I. Ivlev, M. Conrad, F. Kraus, *Z. Kristallogr. - Cryst. Mater.* **2019**, *234*, 415–418.
- [6] K. Brandenburg, H. Putz, *Diamond - Crystal and Molecular Structure Visualization*, Crystal Impact GbR, Bonn, **2019**.
- [7] R. Ahlrichs, M. Bär, M. Häser, H. Horn, C. Kölmel, *Chem. Phys. Lett.* **1989**, *162*, 165–169.
- [8] *TURBOMOLE V7.3, a Development of University of Karlsruhe and Forschungszentrum Karlsruhe GmbH, 1989-2007, TURBOMOLE GmbH, since 2007.*, **2018**.
- [9] F. Weigend, R. Ahlrichs, *Phys. Chem. Chem. Phys.* **2005**, *7*, 3297–3305.
- [10] K. Eichkorn, O. Treutler, H. Öhm, M. Häser, R. Ahlrichs, *Chem. Phys. Lett.* **1995**, *240*, 283–290.
- [11] F. Weigend, *Phys. Chem. Chem. Phys.* **2006**, *8*, 1057–1065.
- [12] G. Knizia, *J. Chem. Theory Comput.* **2013**, *9*, 4834–4843.
- [13] G. Knizia, J. E. M. N. Klein, *Angew. Chem. Int. Ed.* **2015**, *54*, 5518–5522.
- [14] J. P. Perdew, K. Burke, M. Ernzerhof, *Phys. Rev. Lett.* **1996**, *77*, 3865–3868.
- [15] C. Adamo, V. Barone, *J. Chem. Phys.* **1999**, *110*, 6158–6170.
- [16] V. Sivchik, R. K. Sarker, Z.-Y. Liu, K.-Y. Chung, E. V. Grachova, A. J. Karttunen, P.-T. Chou, I. O. Koshevoy, *Chem. Eur. J.* **2018**, *24*, 11475–11484.
- [17] R. E. Stene, B. Scheibe, A. J. Karttunen, W. Petry, F. Kraus, *Eur. J. Inorg. Chem.* **2019**, *2019*, 3672–3682.
- [18] A. J. Karttunen, T. Tynell, M. Karppinen, *J. Phys. Chem. C* **2015**, *119*, 13105–13114.
- [19] R. Dovesi, A. Erba, R. Orlando, C. M. Zicovich-Wilson, B. Civalleri, L. Maschio, M. Rérat, S. Casassa, J. Baima, S. Salustro, et al., *Wiley Interdiscip. Rev.: Comput. Mol. Sci.* **2018**, e1360.
- [20] C. M. Zicovich-Wilson, F. Pascale, C. Roetti, V. R. Saunders, R. Orlando, R. Dovesi, *J. Comput. Chem.* **2004**, *25*, 1873–1881.
- [21] F. Pascale, C. M. Zicovich-Wilson, F. López Gejo, B. Civalleri, R. Orlando, R. Dovesi, *J. Comput. Chem.* **2004**, *25*, 888–897.
- [22] L. Maschio, B. Kirtman, M. Rérat, R. Orlando, R. Dovesi, *J. Chem. Phys.* **2013**, *139*, 164101.
- [23] L. Maschio, B. Kirtman, M. Rérat, R. Orlando, R. Dovesi, *J. Chem. Phys.* **2013**, *139*, 164102.
- [24] *Jmol: An Open-Source Java Viewer for Chemical Structures in 3D*. [Http://www.jmol.org/](http://www.jmol.org/), Jmol Team, **2019**.

## Author Contributions

Benjamin Scheibe: Planning and conducting the experiments, main data acquisition and interpretation, quantum-chemical solid-state calculations, manuscript preparation.

Antti J. Karttunen: Quantum-chemical gas-phase calculations and solid-state calculations in CsF polymorphs, Quantum-chemical gas-phase calculations, CRYSTAL17 basis set development, intrinsic atomic orbital (IAO) and intrinsic bond orbital (IBO) analysis, manuscript preparation.

Ulrich Müller: Data interpretation, preparation of the Bärnighausen tree, crystallographic considerations, manuscript preparation.

Florian Kraus: Project administration, data interpretation, structure chemistry, manuscript preparation.
